# Supplementary material for: Enhancing Nasopharyngeal Carcinoma Cell Separation with Selective Fibronectin Coating and Topographical Modification on Polydimethylsiloxane Scaffold Platforms
Source: MDPI journal article supplement (doi:10.3390/ijms241512409), 2023-08-03
Supplement: s1 [file s1]

Archive with 2 entries (2 files):
- Supplementary Materials.pdf
- Video S1.mp4
