# Supplementary material for: Enhancing Nasopharyngeal Carcinoma Cell Separation with Selective Fibronectin Coating and Topographical Modification on Polydimethylsiloxane Scaffold Platforms
Source: MDPI journal article supplement (doi:10.3390/ijms241512409), 2023-08-03
Supplement: s1 [file s1 › Supplementary Materials.pdf]

**Supplementary Information for:**

**Enhancing Nasopharyngeal Carcinoma Cell Separation with Selective Fibronectin Coating  
and Topographical Modification on Polydimethylsiloxane Scaffold Platforms**

M. T. Wang and S. W. Pang\*

Department of Electrical Engineering

Centre for Biosystems, Neuroscience, and Nanotechnology

City University of Hong Kong, Hong Kong, 999077, China

\*Corresponding Author:

S. W. Pang (pang@cityu.edu.hk)

Department of Electrical Engineering

City University of Hong Kong

83 Tat Chee Avenue, Kowloon

Hong Kong, China

Phone: +852 3442 9853

Fax: +852 3442 0562

## Supplementary Figures and Supplementary Figure Legends

(a)

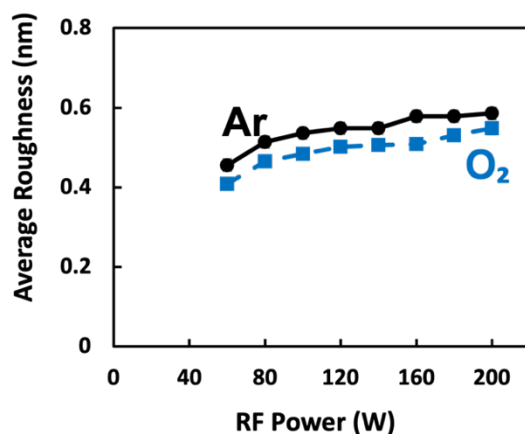

(b)

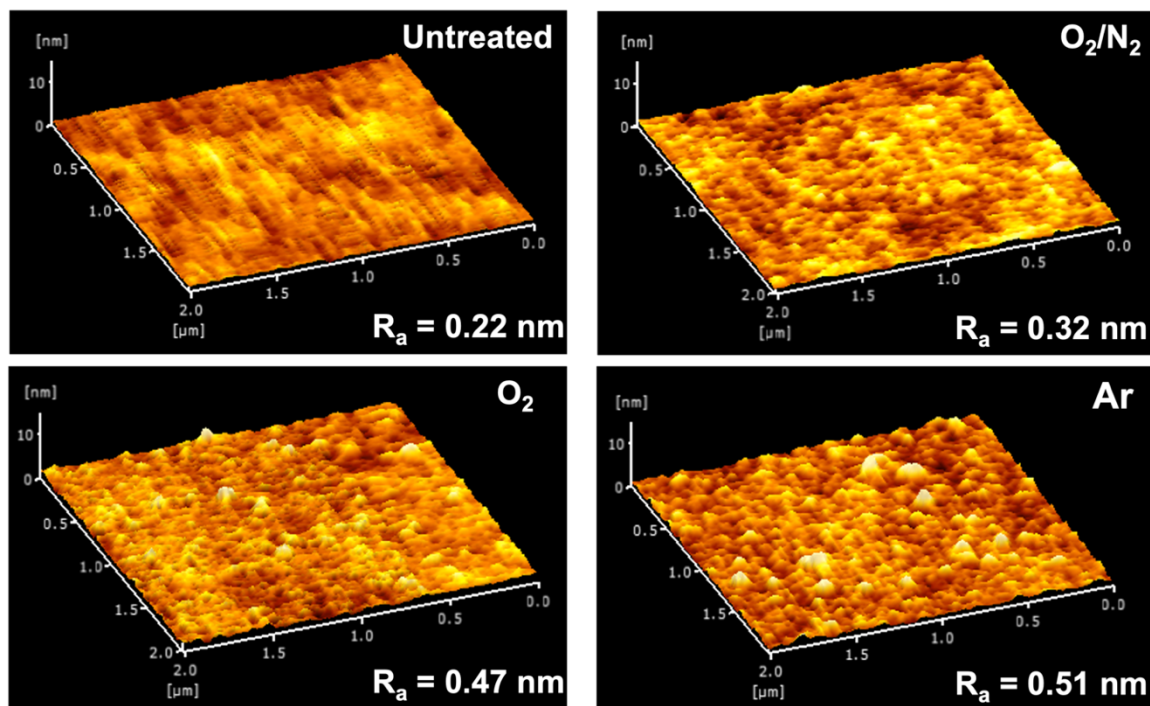

**Supplementary Figure S1. Average roughness of plasma treated polydimethylsiloxane (PDMS).** (a) Average roughness of oxygen (O<sub>2</sub>)- and argon (Ar)-treated PDMS surfaces with RF power ranging from 60 to 200 W. (b) Three-dimensional images of surface roughness measured by atomic force microscope for PDMS surfaces that were untreated, O<sub>2</sub>/nitrogen (N<sub>2</sub>) plasma at 200 W, and O<sub>2</sub> and Ar plasma at 80 W.

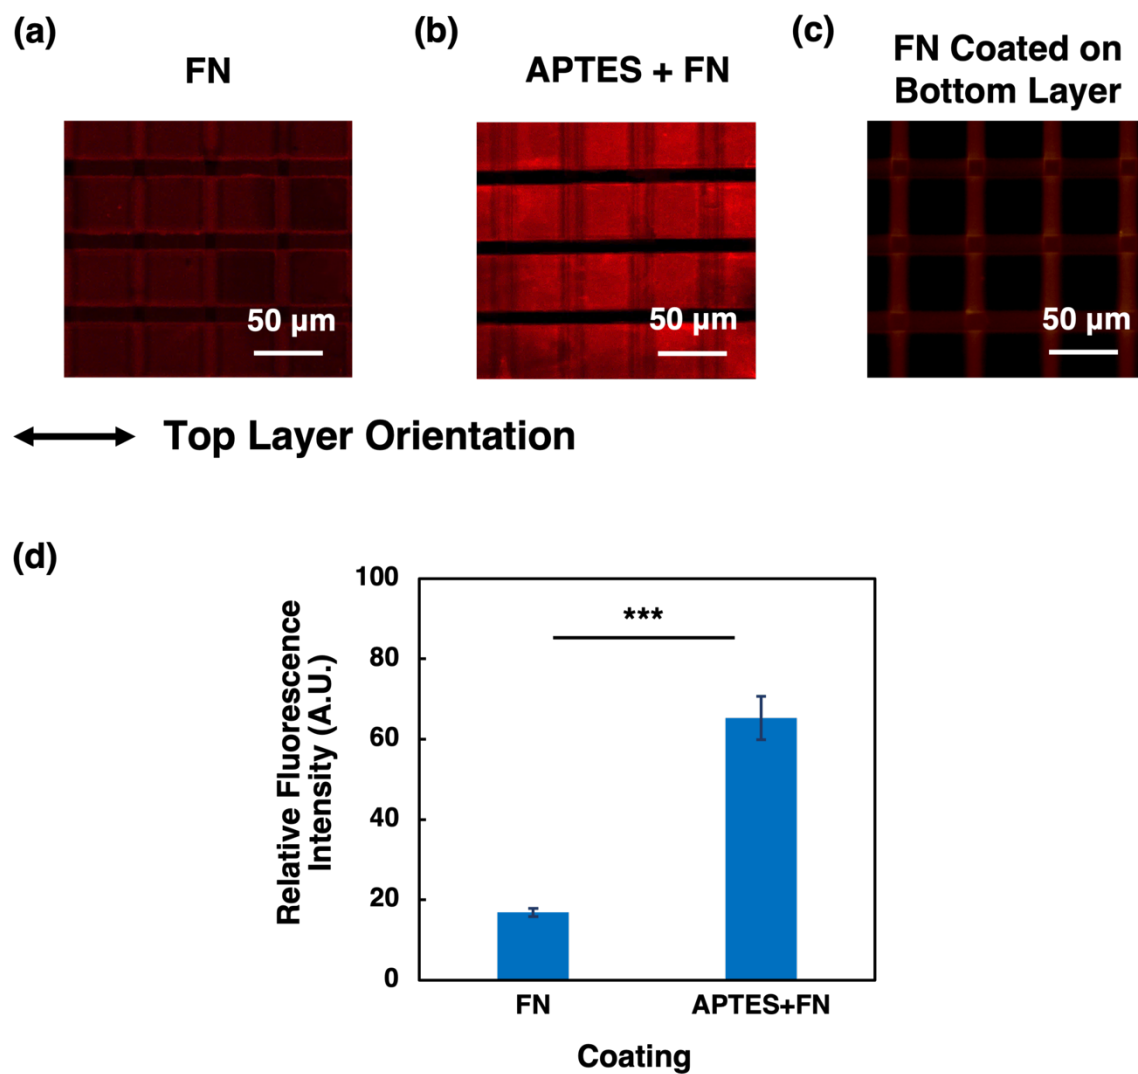

**Supplementary Figure S2. Fluorescent imaging of FN.** Fluorescence signals of (a) fibronectin (FN) and (b) (3-aminopropyl)triethoxysilane (APTES) + FN coated on entire platforms, and (c) FN coated only on top layer sidewalls and bottom layer. (d) Relative fluorescence intensity of FN- and APTES + FN-coated platforms. The fluorescence intensity is relative to the background intensity. One-way ANOVA with Tukey's post hoc test; \*\*\*  $p < 0.001$ .

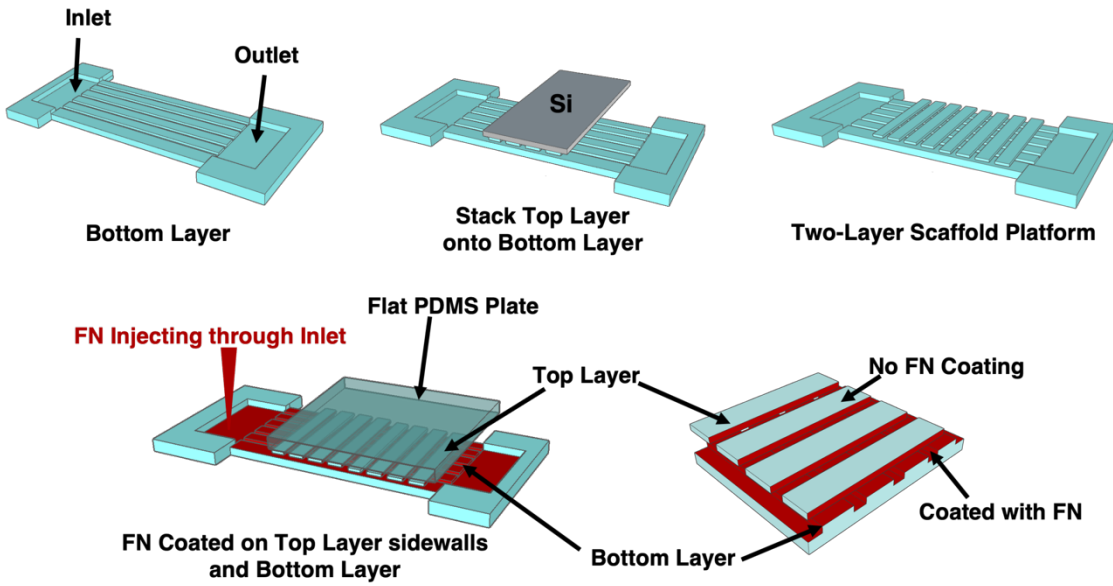

**Supplementary Figure S3.** Fabrication technology of coating FN on top layer sidewalls and bottom layer of two-layer scaffold platform.
